CORRECTION

## Correction: AI-driven healthcare: A review on ensuring fairness and mitigating bias

The *PLOS Digital Health* Staff

### Notice of republication

This article was republished on August 5, 2025, to correct errors in the title that were introduced during the typesetting process. The publisher apologizes for the errors. Please download this article again to view the correct version. The originally published, uncorrected article and the republished, corrected articles are provided here for reference.

### Supporting information

**S1 File. Originally published, uncorrected article.**  
(PDF)

**S2 File. Republished, corrected article.**  
(PDF)

### Reference

1. Chinta SV, Wang Z, Palikhe A, Zhang X, Kashif A, Smith MA, et al. AI-driven healthcare: fairness in AI healthcare: a survey. *PLOS Digit Health*. 2025;4(5):e0000864. <https://doi.org/10.1371/journal.pdig.0000864> PMID: [40392801](https://pubmed.ncbi.nlm.nih.gov/40392801/)

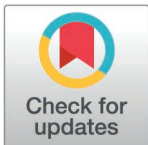

### OPEN ACCESS

**Citation:** The *PLOS Digital Health* Staff (2025) Correction: AI-driven healthcare: A review on ensuring fairness and mitigating bias. *PLOS Digit Health* 4(8): e0000994. <https://doi.org/10.1371/journal.pdig.0000994>

**Published:** August 21, 2025

**Copyright:** © 2025 The *PLOS Digital Health* Staff. This is an open access article distributed under the terms of the [Creative Commons Attribution License](https://creativecommons.org/licenses/by/4.0/), which permits unrestricted use, distribution, and reproduction in any medium, provided the original author and source are credited.
